# Supplementary material
Source: PubMed Central journal article supplement (PMC3434758)
Supplement: supp_194.13.3407_FigS1-S4_TableS1-S3.pdf [file supp_194.13.3407_FigS1-S4_TableS1-S3.pdf]

## Supplementary Figure Legends

- 5 **Supplementary Figure S1. *sacB*-mediated counter-selection used to construct *H. pylori* type II restriction endonuclease-deficient mutants.** HP1366 (*hpyAII*), the target restriction endonuclease gene of the wild type 26695 strain, was first replaced by a *sacB-cat* cassette to generate a chloramphenicol-resistant (Cm<sup>R</sup>)/sucrose-sensitive (Suc<sup>S</sup>) mutant strain by transformation and following selection on Cm-containing media. The *sacB-cat* cassette then was deleted from the locus by transformation with a plasmid carrying a 2.1Kb PCR-product with HP1365 and HP1367 sequences and no intervening ORF, and following counter-selection with sucrose-containing media, resulting  $\Delta hpyAII$  (KO-1).
- 10 **Supplementary Figure S2. Growth of *H. pylori* wild type and the type II restriction endonuclease-deficient mutants.** The wild type strain 26695 and the series of the type II restriction endonuclease-deficient mutants [KO-1, KO-2, KO-3, and KO-4 (26695-REd)] exhibit similar growth during a 5-day incubation in Brucella broth (with 10% NBCS) medium. The experiments were performed independently in triplicate.
- 15 **Supplementary Figure S3. Survival of *H. pylori* wild type and the type II restriction endonuclease-deficient mutants after UV exposure.** *H. pylori* cells on TSA plates were subject to a range of UV exposures and surviving proportions were determined. The series of the type II restriction endonuclease-deficient mutants [KO-1, KO-2, KO-3, and KO-4 (26695-REd)] exhibit similar survival to the wild type strain 26695. The experiments were performed independently in
- 20 triplicate.
- Supplementary Figure S4. Spontaneous mutation frequency of *H. pylori* mutants by evaluating the frequency of an *rpoB* point mutation which confers resistance to rifampin.** The series of the type II restriction endonuclease-deficient mutants [KO-1, KO-2, KO-3, and KO-4 (26695-REd)] exhibit Rif<sup>R</sup> spontaneous mutation rates similar to the wild type strain 26695. The experiments
- 25 were performed independently in triplicate.

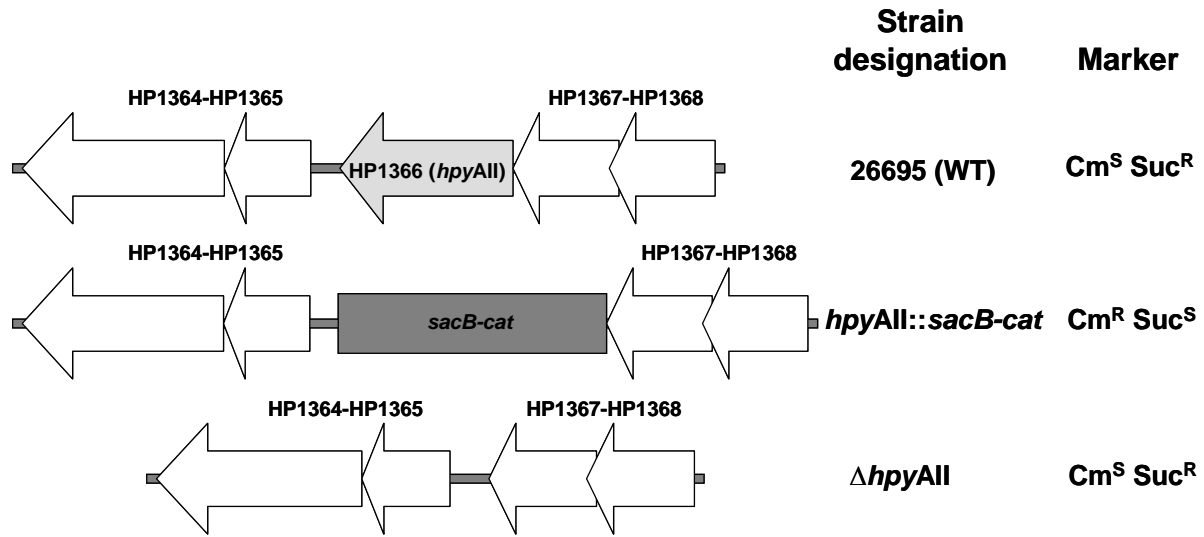

**Supplementary Figure S1.**

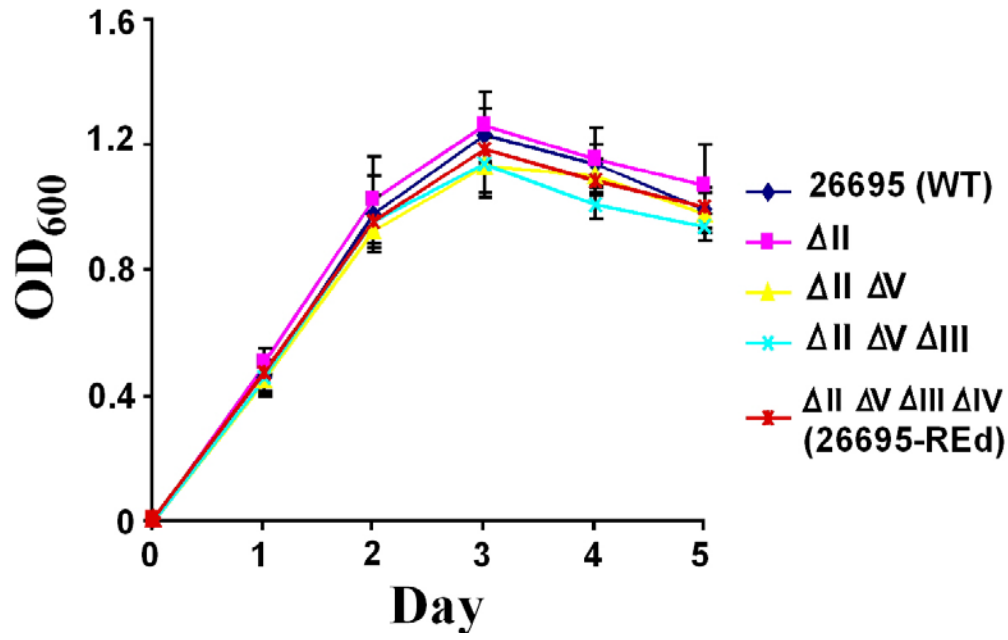

Supplementary Figure S2.

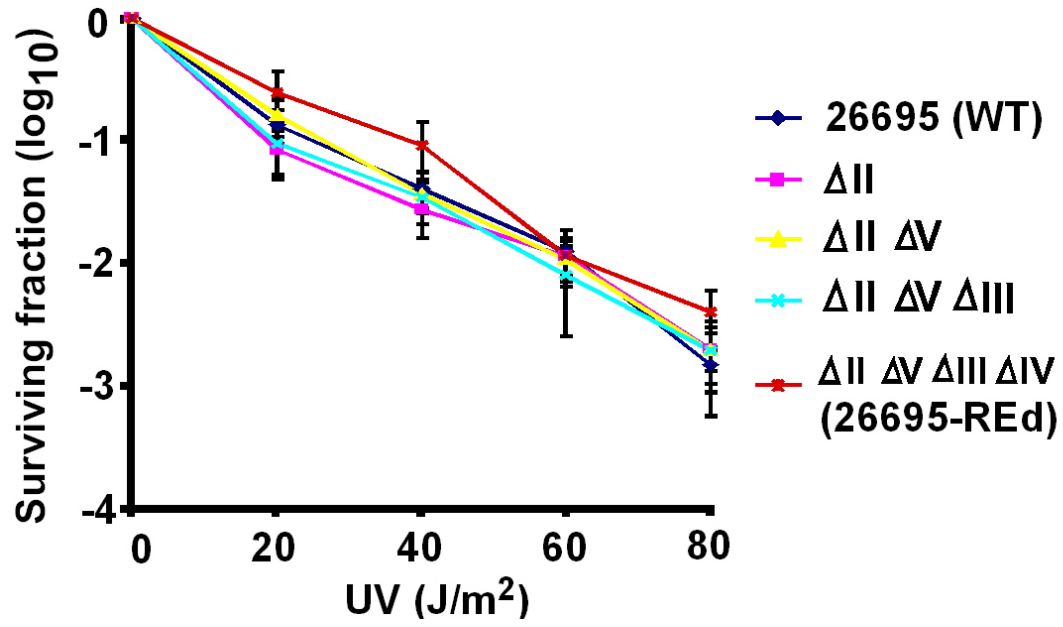

Supplementary Figure S3.

5

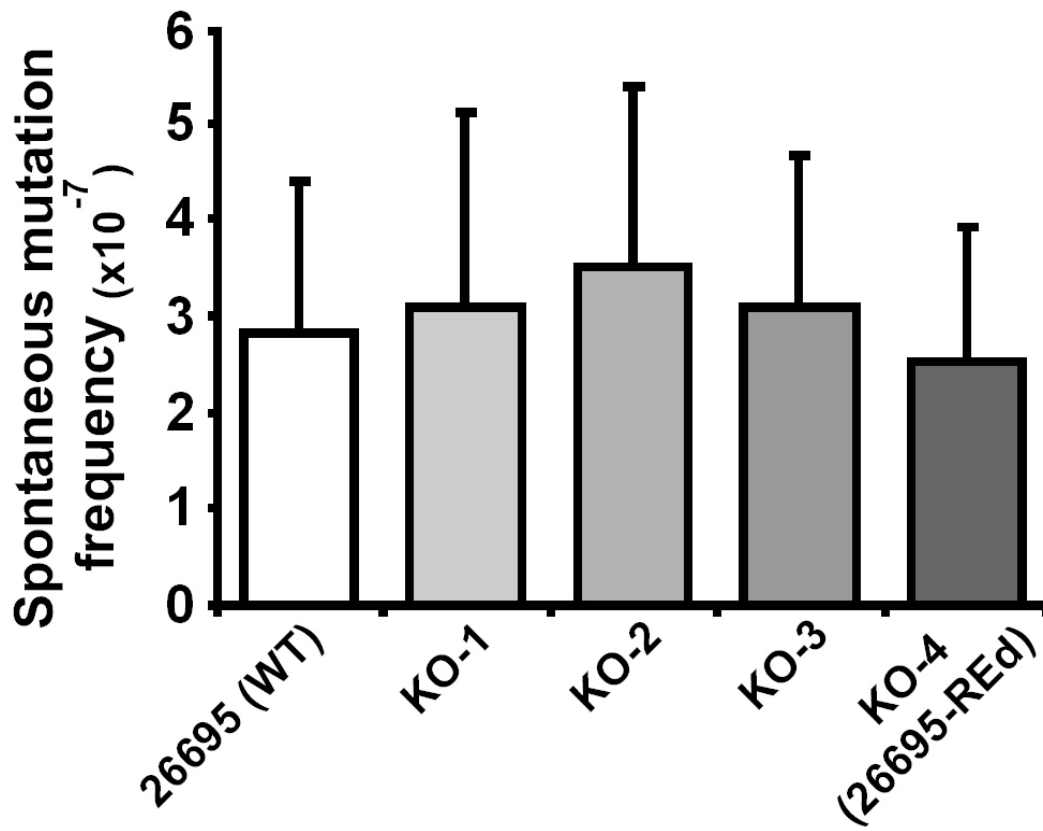

Supplementary Figure S4.

**Supplementary Table S1: Plasmids and bacterial strains used in this study.**

| Plasmid or strain | Relevant characteristics*                                                                                                                                                                                       | Source or reference |
|-------------------|-----------------------------------------------------------------------------------------------------------------------------------------------------------------------------------------------------------------|---------------------|
| pGEM-T easy       | Vector to construct gene mutations, Ap <sup>R</sup>                                                                                                                                                             | Promega             |
| p801R             | pGEM-T easy, 801 bp <i>H. pylori rpsL</i> fragment with A128G point mutation, Ap <sup>R</sup>                                                                                                                   | This work           |
| pCTB8:Km          | pGEM-T easy, <i>H. pylori vacA</i> <sub>60190</sub> :: <i>aphA</i> , Ap <sup>R</sup> , Km <sup>R</sup>                                                                                                          | (11)                |
| pAD1-Cat          | pGEM-T easy, <i>H. pylori ureA</i> <sub>60190</sub> :: <i>cat</i> , Ap <sup>R</sup> , Cm <sup>R</sup>                                                                                                           | (27)                |
| pHel3             | Shuttle plasmid, Km <sup>R</sup>                                                                                                                                                                                | (20)                |
| pKSF              | Contains a <i>kan-sacB</i> cassette, Km <sup>R</sup>                                                                                                                                                            | (10)                |
| pXZ016            | pGEM-T easy, <i>hpyAV</i> upstream flanking region directly fused with <i>hpyAV</i> downstream flanking region, Ap <sup>R</sup>                                                                                 | This work           |
| pXZ017            | pGEM-T easy, <i>hpyAII</i> upstream flanking region directly fused with <i>hpyAII</i> downstream flanking region, Ap <sup>R</sup>                                                                               | This work           |
| pXZ032            | pXZ016, <i>sacB-cat</i> cassette inserted between <i>hpyAV</i> upstream and downstream flanking region to construct $\Delta hpyAV::sacB-cat$ mutation, Ap <sup>R</sup> , Cm <sup>R</sup> , Suc <sup>S</sup>     | This work           |
| pXZ033            | pXZ017, <i>sacB-cat</i> cassette inserted between <i>hpyAII</i> upstream and downstream flanking region to construct $\Delta hpyAII::sacB-cat$ mutation, Ap <sup>R</sup> , Cm <sup>R</sup> , Suc <sup>S</sup>   | This work           |
| pXZ144            | pGEM-T easy, <i>hpyAIII</i> upstream flanking region directly fused with <i>hpyAIII</i> downstream flanking region, Ap <sup>R</sup>                                                                             | This work           |
| pXZ145            | pGEM-T easy, <i>hpyAIV</i> upstream flanking region directly fused with <i>hpyAIV</i> downstream flanking region, Ap <sup>R</sup>                                                                               | This work           |
| pXZ146            | pXZ144, <i>sacB-cat</i> cassette inserted between <i>hpyAIII</i> upstream and downstream flanking region to construct $\Delta hpyAIII::sacB-cat$ mutation, Ap <sup>R</sup> , Cm <sup>R</sup> , Suc <sup>S</sup> | This work           |
| pXZ147            | pXZ145, <i>sacB-cat</i> cassette inserted between <i>hpyAIV</i> upstream and downstream flanking region to construct $\Delta hpyAIV::sacB-cat$ mutation, Ap <sup>R</sup> , Cm <sup>R</sup> , Suc <sup>S</sup>   | This work           |
| <i>E. coli</i>    |                                                                                                                                                                                                                 |                     |
| XL1-blue          | Host for cloning plasmid                                                                                                                                                                                        | Stratagene          |
| <i>H. pylori</i>  |                                                                                                                                                                                                                 |                     |
| 26695             | UK-origin isolate (genomic sequence determined)                                                                                                                                                                 | (55)                |
| J99               | USA-origin isolate (genomic sequence determined)                                                                                                                                                                | (1)                 |
| JP26              | Japan-origin isolate (genomic sequence determined)                                                                                                                                                              | (3)                 |
| J166              | USA-origin isolate                                                                                                                                                                                              | (61)                |
| 60190             | American Type Culture Collection 49503, genome DNA sequence is used as template for pCTB8:Km and pAD1-Cat constructions                                                                                         | (11)                |
| HPXZ285           | KO-1, 26695 $\Delta hpyAII$                                                                                                                                                                                     | This work           |
| HPXZ347           | 26695 <i>vacA::aphA</i> , 26695 transformed with pCTB8:Km, Km <sup>R</sup>                                                                                                                                      | This work           |
| HPXZ379           | 26695 <i>ureA::cat</i> , 26695 transformed with pAD1-Cat, Cm <sup>R</sup>                                                                                                                                       | This work           |
| HPXZ490           | KO-2, 26695 $\Delta hpyAII \Delta hpyAV$                                                                                                                                                                        | This work           |
| HPXZ560           | KO-3, 26695 $\Delta hpyAII \Delta hpyAV \Delta hpyAIII$                                                                                                                                                         | This work           |
| HPXZ566           | KO-4, 26695 $\Delta hpyAII \Delta hpyAV \Delta hpyAIII \Delta hpyAIV$ (26695-REd)                                                                                                                               | This work           |
| HPXZ621           | KO-4 <i>ureA::cat</i> , HPXZ566 transformed with pAD1-Cat, Cm <sup>R</sup>                                                                                                                                      | This work           |
| HPXZ623           | JP26 <i>vacA::aphA</i> , JP26 transformed with pCTB8:Km, Km <sup>R</sup>                                                                                                                                        | This work           |
| HPXZ624           | JP26 <i>ureA::cat</i> , JP26 transformed with pAD1-Cat, Cm <sup>R</sup>                                                                                                                                         | This work           |
| HPXZ626           | J99 <i>vacA::aphA</i> , J99 transformed with pCTB8:Km, Km <sup>R</sup>                                                                                                                                          | This work           |
| HPXZ627           | J99 <i>ureA::cat</i> , J99 transformed with pAD1-Cat, Cm <sup>R</sup>                                                                                                                                           | This work           |
| HPXZ629           | J166 <i>vacA::aphA</i> , J166 transformed with pCTB8:Km, Km <sup>R</sup>                                                                                                                                        | This work           |
| HPXZ630           | J166 <i>ureA::cat</i> , J166 transformed with pAD1-Cat, Cm <sup>R</sup>                                                                                                                                         | This work           |
| HPXZ641           | KO-4 <i>ureA::cat rpsL(Str<sup>R</sup>)</i> , HPXZ621 transformed with p801R, Cm <sup>R</sup> , Str <sup>R</sup>                                                                                                | This work           |
| HPXZ648           | JP26 <i>vacA::aphA rpsL(Str<sup>R</sup>)</i> , HPXZ623 transformed with p801R, Km <sup>R</sup> , Str <sup>R</sup>                                                                                               | This work           |
| HPXZ649           | J99 <i>vacA::aphA rpsL(Str<sup>R</sup>)</i> , HPXZ626 transformed with p801R, Km <sup>R</sup> , Str <sup>R</sup>                                                                                                | This work           |
| HPXZ650           | J166 <i>vacA::aphA rpsL(Str<sup>R</sup>)</i> , HPXZ629 transformed with p801R, Km <sup>R</sup> , Str <sup>R</sup>                                                                                               | This work           |

|         |                                                                                                                    |           |
|---------|--------------------------------------------------------------------------------------------------------------------|-----------|
| HPXZ660 | HPXZ626 strain with a spontaneous Rif <sup>R</sup> mutation, Km <sup>R</sup> , Rif <sup>R</sup>                    | This work |
| HPXZ696 | 26695 <i>vacA::aphA rpsL(Str<sup>R</sup>)</i> , HPXZ347 transformed with p801R, Km <sup>R</sup> , Str <sup>R</sup> | This work |
| HPXZ698 | 26695 <i>ureA::cat rpsL(Str<sup>R</sup>)</i> , HPXZ379 transformed with p801R, Cm <sup>R</sup> , Str <sup>R</sup>  | This work |

---

\*Ap<sup>R</sup>, Cm<sup>R</sup>, Km<sup>R</sup>, Str<sup>R</sup>, Rif<sup>R</sup>, and Suc<sup>S</sup> represent ampicillin-resistant, chloramphenicol-resistant, kanamycin-resistant, streptomycin-resistant, rifampin-resistant, and sucrose-sensitive, respectively.

**Supplementary Table S2. Oligonucleotides used in this study.**

| Oligonucleotide | Primer sequence (5'→3')*                         |
|-----------------|--------------------------------------------------|
| SC-F-XbaI       | GCT <u>CTAG</u> ATATAAGCCCATTTTCATGCTCC          |
| SC-R-XbaI       | GCT <u>CTAG</u> ACTCGAGGCGTGATATAGATTGAAAAGTG    |
| S-R-PstI        | CCCAA <u>ACTGC</u> AGGTTAGCCATTTGCCTGC           |
| C-R-PstI        | CCC <u>CTGC</u> AGCACTACTCTCGACAGAGAGTATA        |
| VacA-F          | <u>GTGAAAGCGAAAAACAAG</u>                        |
| VacA-R          | <u>AAGAGAAGCTTTAAACCCCTCC</u>                    |
| Ure-F           | <u>TCAAGTCCAGTCGTGGCCAC</u>                      |
| Ure-R           | <u>GTTGTCTGCTTGCCTATCAA</u>                      |
| IIL-F-SacII     | TCC <u>CCGCGG</u> CGCTCAATAGGTAATACTCTC          |
| IIL-R-SpeI      | GG <u>ACTAGT</u> TGATAAAATAAAGCGGTGTCTT          |
| IIR-F-SpeI      | GG <u>ACTAGT</u> GTCAAATATCCTTTTTTATTTCGC        |
| IIR-R-PstI      | AA <u>ACTGC</u> AGATGCCGGCTGAATTAGCAAGG          |
| VL-F-SacII      | TCC <u>CCGCGG</u> CGTTGAAAGGCGATAAAGA            |
| VL-R-SpeI       | GG <u>ACTAGT</u> TAAAGTTTTATTGAAACTGGCTAT        |
| VR-F-SpeI       | GG <u>ACTAGT</u> GCTCTTTCATAAGCTACTCCTT          |
| VR-R-PstI       | AA <u>ACTGC</u> AGGAAATAGCGAAGTTATTGCCA          |
| IIIL-F-SacII    | TCC <u>CCGCGG</u> CTCTCATAGAATGATTTCCCCATTCC     |
| IIIL-R-SpeI     | GG <u>ACTAGT</u> TTTTTGCTCCGCTTTAATGTTTTTCTTTATT |
| IIIR-F-SpeI     | GG <u>ACTAGT</u> TATGGTAATCGCGCATTCTAATGAAAT     |
| IIIR-R-PstI     | AA <u>ACTGC</u> AGCCTCTTCAAAGATTAGCCGCAATG       |
| IVL-F-SacII     | TCC <u>CCGCGG</u> GACAGAGGGGAGTTAATGATGTCTC      |
| IVL-R-SpeI      | GG <u>ACTAGT</u> AGGCTCTAAAGTAAGCCCCATTTCT       |
| IVR-F-SpeI      | GG <u>ACTAGT</u> GTCCATTAAGAGTCCTTTTGGCAGAT      |
| IVR-R-PstI      | AA <u>ACTGC</u> AGGAAGTACCTCAATAACGACAAACA       |
| catup           | TGGATGAATTACAAGACT                               |
| catdown         | TCAATCTTTGTGAATTGC                               |
| ureAB-R-1       | CGTGGTGGATTATGTGTATTATCATTATGG                   |
| ureAB-R-2       | CTAGAAATCCGCCATTTGATCCGTTATAGCGGC                |
| ureAB-R-3       | CATTTGAATTTACAGAGTTTAAGGATCGTGC                  |
| ureAB-R-4       | CATCATTGACAGCAACGGCTTCACGCACGG                   |
| ureAB-R-5       | CAAAATCCGCATAACGGCAATACGCCTTAAAC                 |
| ureAB-R-6       | TTAGTAATGGTCTTATTCAAACCTGGCTTTG                  |
| ureAB-R-7       | GTGCGGGTGGTGTGTTTTGGTTTTCTAAATTA                 |
| ureAB-L-1       | GCCAGGCTCAAACCTTACCGCTGTCCCGCT                   |
| ureAB-L-2       | GATAGTAGTCGCATTAGTGCCATCAGCAGG                   |
| ureAB-L-3       | GTTATCGCCTTTTTCTTCTTTCAAGCGGCC                   |
| ureAB-L-4       | CAACATATAACAATACAAGTCCTAGCATTGC                  |
| ureAB-L-5       | CCTCGTTTCAAACCATTTCAAATCCACATG                   |
| ureAB-L-6       | CCGTGTAAAGGAACTGGCTAGAGAGATTGG                   |
| ureAB-L-7       | GCCGTGTGCGGACAGCCTCCTGTTTCTACGC                  |

\* Restriction sites underlined; *XbaI* (TCTAGA), *SacII* (CCGCGG), *SpeI* (ACTAGT), *PstI* (CTGCAG).



**Supplementary Table S3. Susceptibility of *H. pylori* wild type and mutant strains to levofloxacin<sup>a</sup>.**

| Strain               | Genotype                                                                | MIC                  |
|----------------------|-------------------------------------------------------------------------|----------------------|
|                      |                                                                         | Levofloxacin (μg/mL) |
| 26695                | Wild type                                                               | 0.074 ± 0.017        |
| HPXZ285              | KO-1 ( $\Delta$ hpyAII)                                                 | 0.079 ± 0.017        |
| HPXZ490              | KO-2 ( $\Delta$ hpyAII $\Delta$ hpyAV)                                  | 0.072 ± 0.015        |
| HPXZ560              | KO-3 ( $\Delta$ hpyAII $\Delta$ hpyAV $\Delta$ hpyAIII)                 | 0.072 ± 0.015        |
| HPXZ566 <sup>b</sup> | KO-4 ( $\Delta$ hpyAII $\Delta$ hpyAV $\Delta$ hpyAIII $\Delta$ hpyAIV) | 0.079 ± 0.017        |

<sup>a</sup>Each experiment was repeated  $\geq 3$  times.

<sup>b</sup>Also named as 26695-REd.

5
